# Supplementary material
Source: Springer Nature journal article supplement (https://www.springermedizin.de/resource/supplementary/12997_2013_100_MOESM2_ESM.pdf/9623310)

# Gender and cough response to 500 mM citric acid

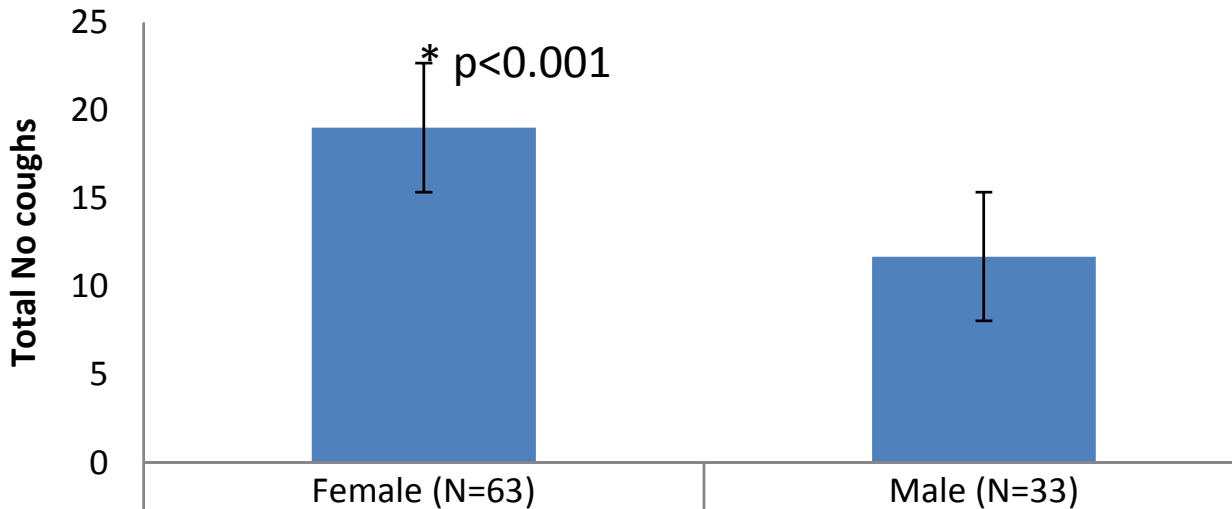

Supplement: MOESM2 [file 9623310]
